# Supplementary material for: A highly sensitive FET-type aptasensor using flower-like MoS2 nanospheres for real-time detection of arsenic(iii)
Source: Royal Society of Chemistry journal article supplement (doi:10.1039/c7nr01661a), 2017-01-01
Supplement: c7nr01661a1.pdf [file c7nr01661a1.pdf]

***Supporting Information for:***

**Highly sensitive FET-type aptasensor using flower-like MoS<sub>2</sub>  
nanospheres for real-time detection of arsenic(III)**

*Ji Hyun An,<sup>†</sup> Jyongsik Jang,<sup>†,\*</sup>*

<sup>†</sup>School of Chemical and Biological Engineering, Seoul National University, Seoul 151-742, Republic  
of Korea

Corresponding Author:

<sup>†</sup>Tel: +82-2-880-7069; Fax: +82-2-880-1604

\*E-mail: jsjang@plaza.snu.ac.kr

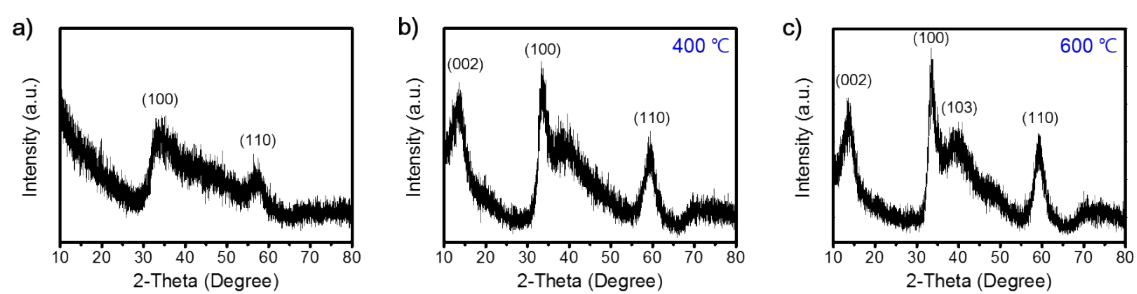

**Fig. S1.** XPS patterns of FMNSs a) before annealing, b) after annealing at 400°C, and c) after annealing at 600°C.

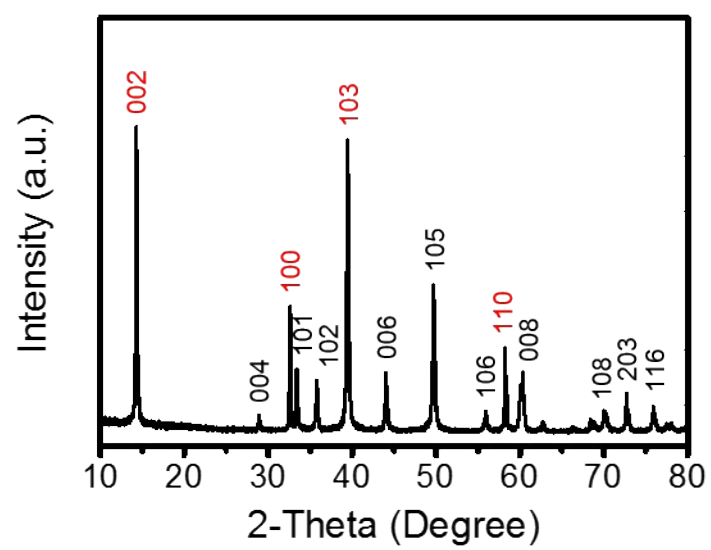

**Fig. S2.** XPS pattern of bulk-MoS<sub>2</sub>.

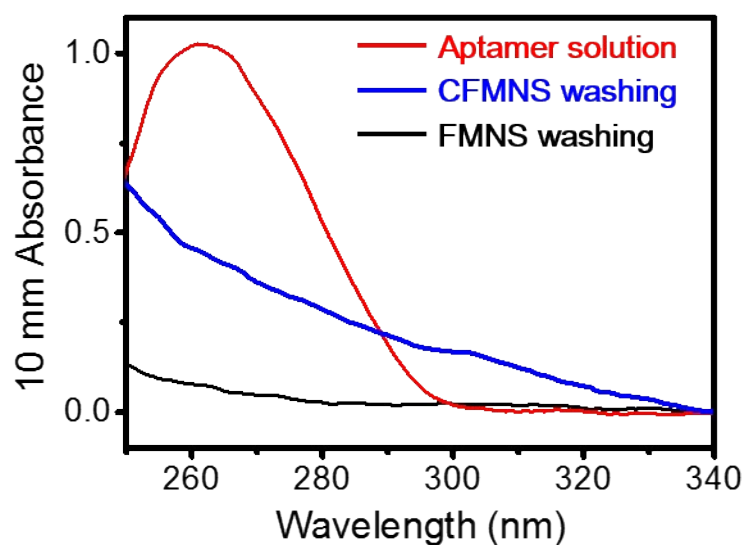

**Fig. S3.** The absorbance of immobilized aptamer on FMNS and CFMNS surfaces before and after washing.

- NanoDrop 2000/2000c spectrophotometer was used to evaluate the concentration of immobilized aptamer on the FMNS and CFMNS surfaces. The solution of Ars-3 aptamer (1  $\mu$ M) was measured before introduced into the FMNS and CFMNS surfaces (Fig. S3, red-line), revealing 32.2 ng/mL concentration. The aptamer solution was exposed to the surfaces for 6h, and then rinsed with buffer solution. The washed solutions for the FMNS and CFMNS samples were measured (Fig. S2, black and blue lines). Each of concentrations after washing was 15.1 ng/ $\mu$ L and 2.6 ng/ $\mu$ L. From these results, 17.1 and 29.6 ng/ $\mu$ L concentrations of aptamer were immobilized on the FMNS and CFMNS surfaces, respectively.

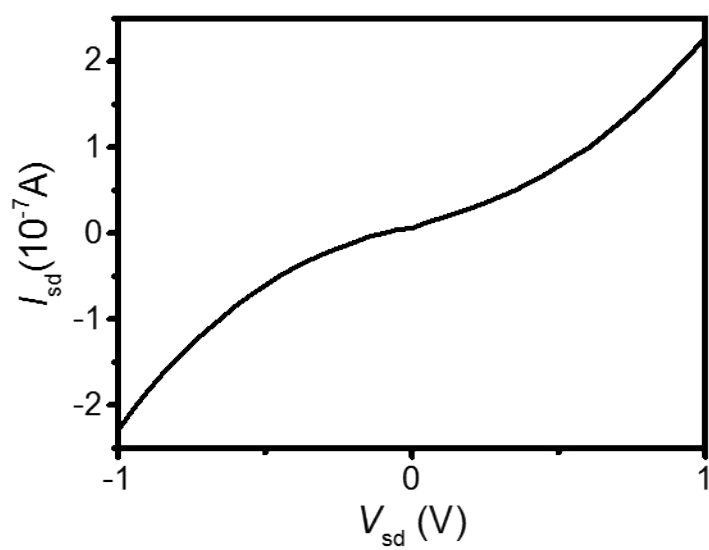

**Fig. S4.** Current–voltage ( $I$ – $V$ ) curve of FMNSs-based electrode.

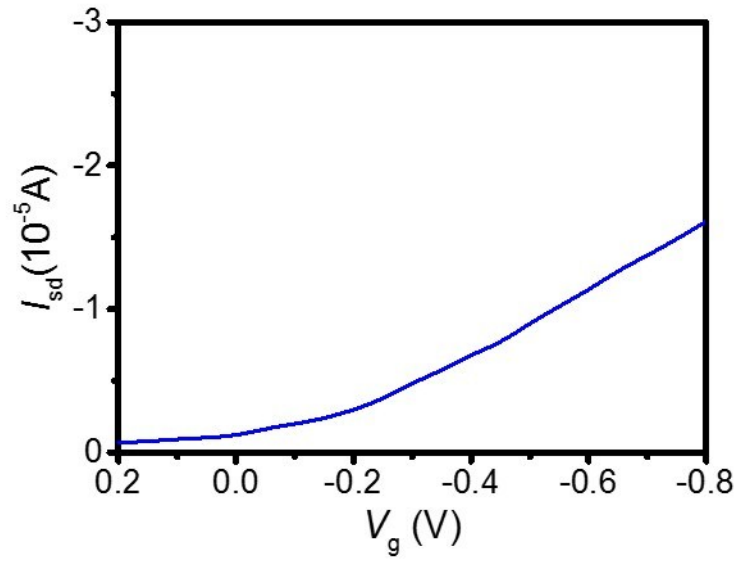

**Fig. S5.** Transfer characteristics of CFMNS sensor for a constant  $V_{sd} = -100$  mV ( $V_g$ , 0.2 to  $-0.8$  V).

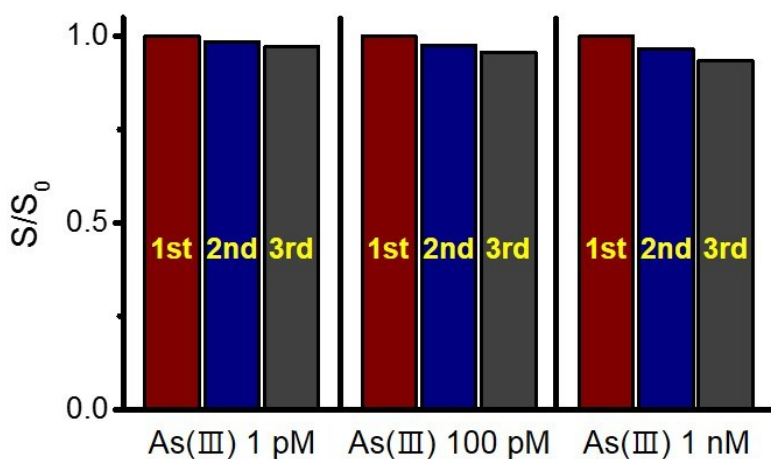

**Fig. S6.** A re-useable FET system for As(III) detection; the sensitivity changes were measured through the consecutive assay of three times at 1 pM, 100 pM, and 1 nM concentrations of As(III) (the sensitivity change was calculated as  $S/S_0$ , where  $S_0$  is the initial sensitivity and  $S$  is the measured sensitivity after washing and rinsing process).

- Fig. S6 demonstrates the reusable property of the FET sensor (the sensitivity changes were calculated as  $S/S_0$ , where  $S_0$  is the initial sensitivity and  $S$  is the measured sensitivity after the washing and rinsing processes). The sensitivity changes were calculated three times at various concentrations of As(III) (1 pM, 100 pM, and 1 nM). The recycle process is composed of two steps: (i) introduction of the As(III) into the aptasensor, (ii) washing with dilute sodium chloride solution and PBS, and then drying under nitrogen stream. The FET-type aptasensors showed an efficient repeatability with various As(III) concentrations by regenerating the aptamer in dilute NaCl solution. Although, the sensitivity decreased slightly at 1 nM concentration of As(III) (*ca.* 6%) due to aptamer degradation, this result indicates that the aptasensor features reproducible and reusable properties.

**Table. S1.** Zeta potential measurements for FMNS samples.

| FMNSs    | Zeta Potential (mV) |
|----------|---------------------|
| Sample 1 | -73.46              |
| Sample 2 | -79.54              |
| Sample 3 | -84.60              |



**Table S2.** Sensing performance compared with previous researches using electrochemical method.

| Detection methods     | Sensing materials                        | Detection limit | References |
|-----------------------|------------------------------------------|-----------------|------------|
| Electrochemistry      | Au nanoparticles                         | 200 pM          | 19         |
| Electrochemistry      | Ag /GO nanocomposites                    | 240 pM          | 41         |
| Electrochemistry      | FePt nanoparticles                       | 10 nM           | 42         |
| Electrochemistry      | SnO <sub>2</sub> nanosheets              | 50 nM           | 43         |
| Electrochemistry(FET) | CPPy-coated MoS <sub>2</sub> nanospheres | 1 pM            | This work  |

**Table S3.** Inductively Coupled Plasma-Atomic Emission Spectrometer (ICPS) analysis for Han River.

| Metal | Weight concentration (mg/L) | Molar concentration (mM) |
|-------|-----------------------------|--------------------------|
| As    | 0.381                       | 0.0052                   |
| Mg    | 8.488                       | 0.3486                   |
| Fe    | 0                           | 0                        |
| Zn    | 0                           | 0                        |
| Cu    | 0                           | 0                        |
| Mn    | 0                           | 0                        |
| Li    | 0                           | 0                        |
| Cd    | 0                           | 0                        |
| Co    | 0                           | 0                        |
| Ni    | 0                           | 0                        |
